# Supplementary material
Source: PubMed Central journal article supplement (PMC2747200)
Supplement: 0908805106_0908805106SI.pdf [file 0908805106_0908805106SI.pdf]

# Supporting Information

Shimatani et al. 10.1073/pnas.0908805106

## SI Text

**Cell Lines.** The BA-1 (B220<sup>+</sup> pro-B cell leukemia) cell line was established from the bone marrow of SPA-1<sup>-/-</sup> mice by *bcr-abl* (*GFP*) transduction. The Wo-1 (pro-T cell leukemia) cell line was established from the T cell leukemia developed in the recipients of C3G-transfected Spa-1<sup>-/-</sup> bone marrow cells. These leukemia cells in blood were monitored by flow cytometry for GFP.

**Flow Cytometry and Cell Cultures.** The following antibodies were used: antibodies to CD3 $\epsilon$ , CD4, CD8, CD25, CD44, CD45.1, CD45.2, CD62L, CD69, B220, TCR-V $\beta$ s, Foxp3, IL-7R $\alpha$ , IL-15R $\beta$ , annexin V (eBioscience), CD121b, and TCR $\beta$  (BD Pharmingen). The cells were cultured in wells ( $1 \times 10^5$  cells/well) coated with anti-CD3 antibody (5  $\mu$ g/mL) with or without soluble anti-CD28 antibody (2.5 g/mL) or IL-2 (100 U/mL). CD4<sup>+</sup> T cells from OT-IITg mice ( $5 \times 10^4$  cells/well) were cultured in the presence of  $\gamma$ -ray-irradiated B6 splenocytes ( $5 \times 10^5$  cells) and OVA (1  $\mu$ M).

**qRT-PCR Analysis.** Total RNA was extracted from the purified CD4<sup>+</sup> T cell subpopulations with a NucleoSpin RNA kit (Macherey-

Nagel), followed by cDNA synthesis with SuperScript III (Invitrogen). The primer pairs used are listed in Table S2. The transcripts of each gene were normalized to those of cyclophilin.

**Immunoblot Analysis.** Cells were lysed with ice-cold RIPA lysis buffer containing protease inhibitors, and the extracts were subjected to immunoblotting. Antibodies used included those to  $\beta$ -actin, Bcl6, C/EBP $\alpha$ , ERK2, pERK1/2, cFos, IRF8, OcaB, Satb1, VDR (Santa Cruz), c-Jun, c-Myc, and cyclin D1 (Cell Signaling Technology).

**SA- $\beta$ -Gal Staining.** The microscopic images of SA- $\beta$ -Gal staining were stored in Tiff files, and blue color signal per cell was quantified using MetaMorph software (Molecular Devices).

**DNA Microarray and Clustering Analysis.** PMT levels were adjusted to achieve 0.1%–0.5% pixel saturation, and each Tiff image was analyzed using GenePix Pro 6.0 (Molecular Devices). Data were filtered to remove low-confidence measurements and globally normalized per array such that the median log<sub>2</sub> (Cy3/Cy5 fluorescence ratio) was 0 after normalization.

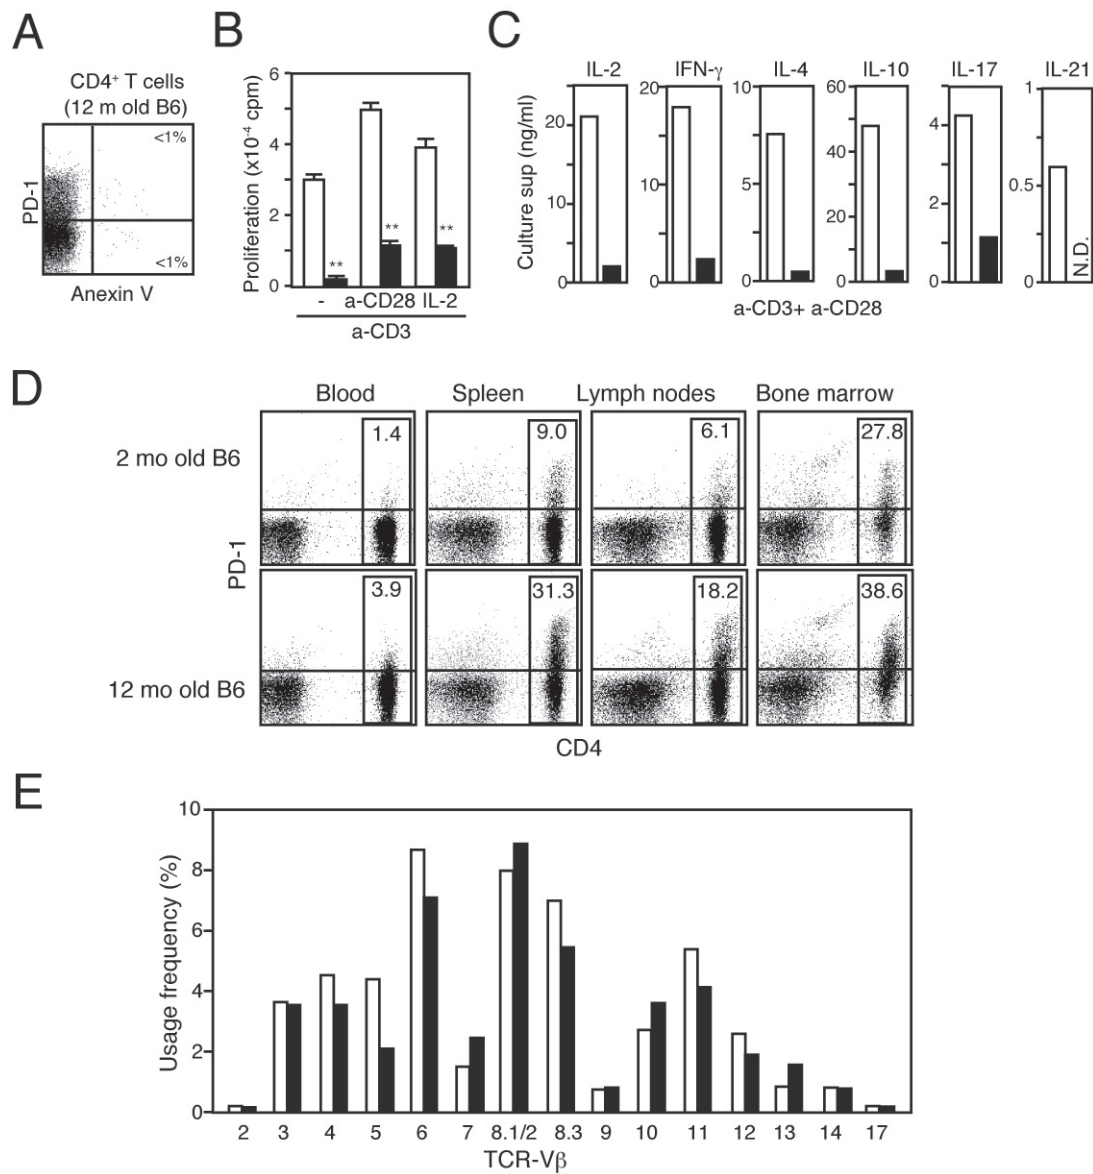

**Fig. S1.** Proliferation capacity, organ distribution, and TCR $\beta$  repertoire of PD-1<sup>+</sup> MP CD4<sup>+</sup> T cells. (A) Spleen cells from 12-month-old B6 mice were 3-color-analyzed with the indicated antibodies. (B) PD-1<sup>-</sup> (open columns) and PD-1<sup>+</sup> (closed columns) CD44<sup>high</sup> CD4<sup>+</sup> T cells sorted from 12-month-old B6 mice were cultured in the presence of anti-CD3 antibody (5  $\mu$ g/mL) with or without anti-CD28 antibody (2.5  $\mu$ g/mL) or IL-2 (100 U/mL) for 3 days and pulsed with <sup>3</sup>H-TdR. \*\* $P < .01$ . (C) PD-1<sup>-</sup> (open columns) and PD-1<sup>+</sup> (solid columns) CD44<sup>high</sup> CD4<sup>+</sup> T cells sorted from aged mice were cultured in the presence of anti-CD3 plus anti-CD28 antibodies for 3 days, and the indicated lymphokines were assessed by ELISA. ND, not detectable. (D) Cells from the blood and indicated lymphoid tissues of 2-month-old and 12-month old B6 mice were 3-color-analyzed with anti-CD3, anti-PD-1, and anti-CD4 antibodies. The profiles in a CD3<sup>+</sup> gate are indicated. (E) PD-1<sup>-</sup> (open columns) and PD-1<sup>+</sup> (closed columns) CD44<sup>high</sup> CD4<sup>+</sup> T cells sorted from 12-month-old B6 mice were analyzed with a set of anti-TCR $\beta$  chain antibodies using FACSCaliber.



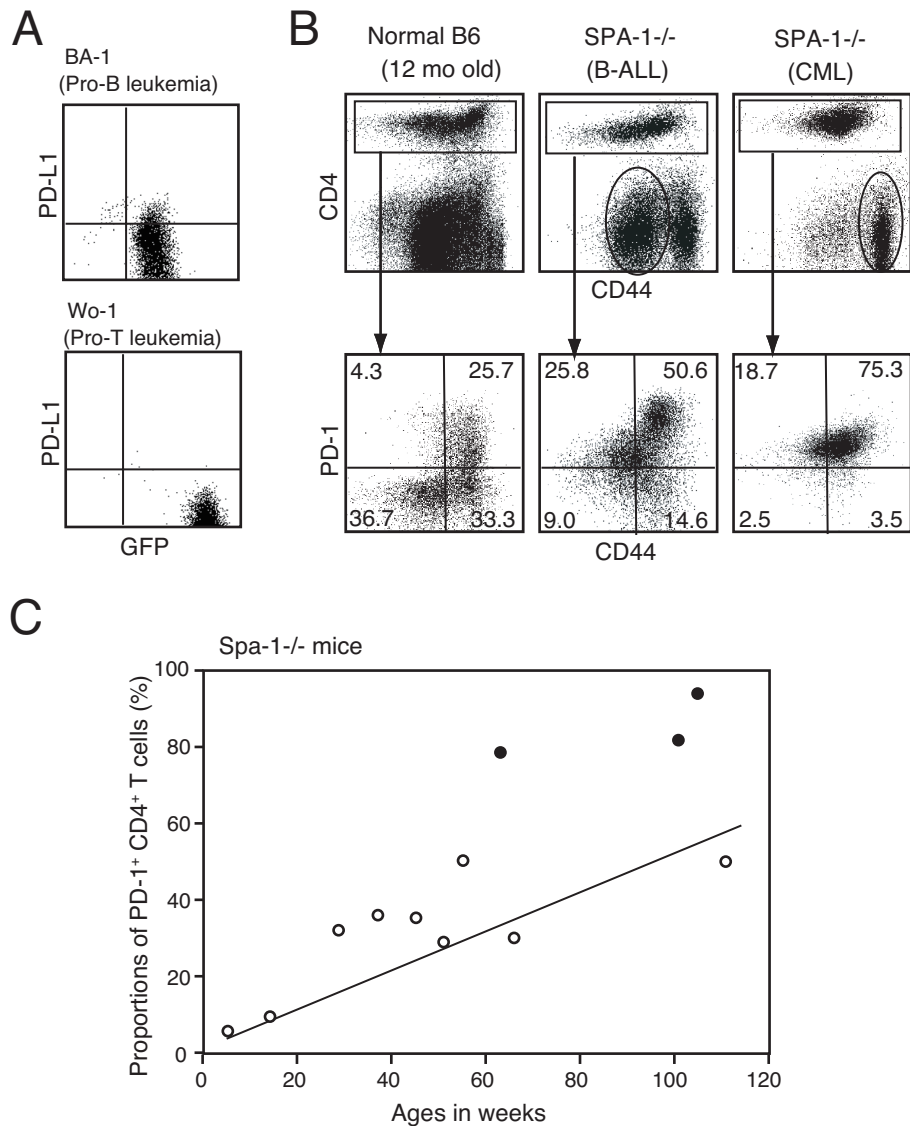

**Fig. S3.** PD-1<sup>+</sup> MP CD4<sup>+</sup> T cells increase in number as Spa-1<sup>-/-</sup> mice spontaneously develop frank leukemia. (A) PD-L1 expression was analyzed in the leukemia cell lines BA-1 (pro-B cell leukemia) and Wo-1 (pro-T cell leukemia), both of which are capable of inducing the rapid generation of PD-1<sup>+</sup> MP CD4<sup>+</sup> T cells in vivo. (B) Spleen cells from Spa-1<sup>-/-</sup> mice with frank leukemia (acute B lymphoblastic leukemia and chronic myelogenous leukemia) and from age-matched (12-month-old) control B6 mice were 3-color-analyzed with the indicated antibodies. Circles indicate the leukemia cells. (C) The proportions of PD-1<sup>+</sup> MP CD4<sup>+</sup> T cells in the spleen cells from Spa-1<sup>-/-</sup> mice at various ages are shown. Open circles indicate mice with no evidence of leukemia; closed circles, mice with frank leukemia.

Table S1. DNA microarray analysis

|                                    |                                                                     | Normal aged B6              |                   |       |
|------------------------------------|---------------------------------------------------------------------|-----------------------------|-------------------|-------|
|                                    |                                                                     | MP CD4 <sup>+</sup> T cells |                   |       |
|                                    |                                                                     | PD-1 <sup>-</sup>           | PD-1 <sup>+</sup> | Ratio |
| <b>Overexpressed genes</b>         |                                                                     |                             |                   |       |
| <b>Transcription factors</b>       |                                                                     |                             |                   |       |
| <i>Batf</i>                        | Basic leucine zipper transcription factor, ATF-like                 | 883                         | 2,824             | 3.2   |
| <i>Nfil3</i>                       | Nuclear factor, interleukin-3, regulated                            | 237                         | 740               | 3.1   |
| <i>Zdhhc2</i>                      | Zinc finger, DHHC domain-containing 2                               | 145                         | 388               | 2.7   |
| <i>Hif1a</i>                       | Hypoxia-inducible factor 1, alpha subunit                           | 292                         | 1,003             | 3.4   |
| <i>Plagl1</i>                      | Pleiomorphic adenoma gene-like 1                                    | 143                         | 826               | 5.8   |
| <i>Tox</i>                         | Thymocyte selection-associated HMG box gene                         | 684                         | 2,017             | 3.0   |
| <i>Cebpa</i>                       | CCAAT/enhancer binding protein (C/EBP), alpha                       | 183.4                       | 970.5             | 4.8   |
| <i>Pou2af1</i>                     | POU domain, class 2, associating factor 1                           | 265.8                       | 948.4             | 3.2   |
| <i>Bcl6</i>                        | B-cell leukemia/lymphoma 6                                          | 1,147.3                     | 3,914.7           | 3.1   |
| <i>Egr2</i>                        | Early growth response 2                                             | 765.1                       | 1,622.8           | 1.9   |
| <i>Vdr</i>                         | Vitamin D receptor, mRNA                                            | 183.8                       | 893.1             | 4.4   |
| <b>Membrane proteins</b>           |                                                                     |                             |                   |       |
| <i>Pdcd1</i>                       | Programmed cell death 1                                             | 107                         | 646               | 6.0   |
| <i>Cacna1d</i>                     | Calcium channel, voltage-dependent, L type, alpha 1D                | 40                          | 161               | 4.0   |
| <i>Cd121b</i>                      | Interleukin 1 receptor, type II                                     | 79                          | 584               | 7.4   |
| <i>Ptger2</i>                      | Prostaglandin E receptor 2 (subtype EP2)                            | 63                          | 241               | 3.8   |
| <i>Tnfsf8</i>                      | Tumor necrosis factor (ligand) superfamily, member 8                | 333                         | 959               | 2.9   |
| <i>Cxcr4</i>                       | Chemokine (C-X-C motif) receptor 4                                  | 168                         | 874               | 5.2   |
| <i>Cd200</i>                       | Cd200 antigen                                                       | 204                         | 678               | 3.3   |
| <i>Cd83</i>                        | CD83 antigen                                                        | 310                         | 1,491             | 4.8   |
| <i>Blr1</i>                        | Burkitt lymphoma receptor 1                                         | 529                         | 1,757             | 3.3   |
| <i>Cd81</i>                        | CD 81 antigen (Cd81)                                                | 3426.2                      | 11,450.9          | 3.0   |
| <b>Cytokines/secreted proteins</b> |                                                                     |                             |                   |       |
| <i>Sostdc1</i>                     | Sclerostin domain-containing 1                                      | 397                         | 5,375             | 13.5  |
| <i>Ccl3</i>                        | Chemokine (C-C motif) ligand 3 [Source: MarkerSymbol;Acc:MGI:98260] | 107                         | 646               | 6.0   |
| <i>Ccl4</i>                        | Chemokine (C-C motif) ligand 4                                      | 203                         | 926               | 4.6   |
| <i>Il4</i>                         | Interleukin-4                                                       | 176                         | 421               | 2.4   |
| <i>Il21</i>                        | Interleukin-21                                                      | 173                         | 1,017             | 5.9   |
| <i>Stfa1</i>                       | Stefin A3                                                           | 19                          | 229               | 12.3  |
| <i>Spp1</i>                        | Pogo transposable element with ZNF domain                           | 96                          | 1,418             | 14.7  |
| <i>Esm1</i>                        | Endothelial cell-specific molecule 1                                | 179                         | 530               | 3.0   |
| <b>Cytoplasmic proteins</b>        |                                                                     |                             |                   |       |
| <i>Cdkn2b</i>                      | Cyclin-dependent kinase inhibitor 2B (p15, inhibits CDK4)           | 75                          | 294               | 3.9   |
| <i>Sccpdh</i>                      | Saccharopine dehydrogenase (putative)                               | 92                          | 461               | 5.0   |
| <i>Rgs16</i>                       | Regulator of G-protein signaling 16                                 | 97                          | 492               | 5.1   |
| <i>Srxn1</i>                       | Sulfiredoxin 1 homolog ( <i>Saccharomyces cerevisiae</i> )          | 135                         | 361               | 2.7   |
| <i>Pfn2</i>                        | Profilin 2                                                          | 66                          | 241               | 3.7   |
| <i>Stk39</i>                       | Serine/threonine kinase 39, STE20/SPS1 homolog (yeast)              | 502                         | 1,154             | 2.3   |
| <i>Cxxc5</i>                       | Ring finger protein 128                                             | 103                         | 266               | 2.6   |
| <i>Stx11</i>                       | Syntaxin 11                                                         | 325                         | 1,241             | 3.8   |
| <i>Tbc1d4</i>                      | TBC1 domain family, member 4                                        | 551                         | 1,696             | 3.1   |
| <b>Underexpressed genes</b>        |                                                                     |                             |                   |       |
| <b>Transcription factors</b>       |                                                                     |                             |                   |       |
| <i>Cbfa2t3 h</i>                   | Core-binding factor, runt domain, alpha subunit 2                   | 385                         | 54                | 0.1   |
| <i>Jun</i>                         | Jun oncogene                                                        | 466                         | 114               | 0.2   |
| <i>Irf8</i>                        | Interferon regulatory factor 8                                      | 607                         | 73                | 0.1   |
| <i>Satb1</i>                       | Special AT-rich sequence binding protein 1                          | 912                         | 83                | 0.1   |
| <i>Cd74</i>                        | <i>Mus musculus</i> CD74 antigen                                    | 8,101.8                     | 2,714.8           | 0.3   |
| <b>Membrane proteins</b>           |                                                                     |                             |                   |       |
| <i>Cd226</i>                       | CD226 antigen                                                       | 309.4                       | 18.5              | 0.1   |
| <i>Cd74</i>                        | <i>Mus musculus</i> CD74 antigen                                    | 8,101.8                     | 2,714.8           | 0.3   |
| <i>Cd8b1</i>                       | CD8 antigen, beta chain 1                                           | 451                         | 164               | 0.4   |
| <i>H2-Ob</i>                       | Histocompatibility 2, O region beta locus                           | 686                         | 332               | 0.5   |
| <i>Sell</i>                        | Selectin, lymphocyte                                                | 695                         | 163               | 0.2   |
| <i>Il7r</i>                        | Interleukin 7 receptor                                              | 1,039                       | 470               | 0.5   |
| <i>Ccr7</i>                        | Chemokine (C-C motif) receptor 7                                    | 238                         | 95                | 0.4   |
| <i>Trat1</i>                       | T cell receptor-associated transmembrane adaptor 1                  | 1,144                       | 309               | 0.3   |
| <i>Cd72</i>                        | CD72 antigen                                                        | 477                         | 130               | 0.3   |

|                             |                                                                                    | Normal aged B6              |                   |       |
|-----------------------------|------------------------------------------------------------------------------------|-----------------------------|-------------------|-------|
|                             |                                                                                    | MP CD4 <sup>+</sup> T cells |                   |       |
|                             |                                                                                    | PD-1 <sup>-</sup>           | PD-1 <sup>+</sup> | Ratio |
| <i>Ccr2</i>                 | Chemokine (C-C motif) receptor 2                                                   | 660                         | 188               | 0.3   |
| <i>Klrd1</i>                | Killer cell lectin-like receptor, subfamily D, member 1                            | 235                         | 43                | 0.2   |
| <i>H2-DMb2</i>              | Histocompatibility 2, class II, locus Mb1                                          | 560                         | 90                | 0.2   |
| <i>Cd7</i>                  | CD7 antigen                                                                        | 334                         | 133               | 0.4   |
| <i>Ifitm1</i>               | Interferon-induced transmembrane protein 1                                         | 303                         | 44                | 0.1   |
| <i>Cd8a</i>                 | CD8 antigen, alpha chain                                                           | 167                         | 52                | 0.3   |
| <i>Klrc1</i>                | Killer cell lectin-like receptor subfamily C, member 1                             | 281                         | 33                | 0.1   |
| <i>Lair1</i>                | Leukocyte-associated Ig-like receptor 1                                            | 142                         |                   |       |
| <i>Cd74</i>                 | CD74 antigen                                                                       | 13,810                      | 2,083             | 0.2   |
| <i>Fcer1 g</i>              | Fc receptor, IgE, high-affinity I, gamma polypeptide                               | 968                         | 70                | 0.1   |
| <i>Amica1</i>               | Adhesion molecule, interacts with CXADR antigen 1                                  | 474                         | 36                | 0.1   |
| <i>Ly6d</i>                 | Lymphocyte antigen 6 complex, locus D                                              | 412                         | 54                | 0.1   |
| <i>Ly6c1</i>                | Lymphocyte antigen 6 complex, locus C1                                             | 1,105                       | 24                | 0.0   |
| <i>H2-Eb1</i>               | Histocompatibility 2, class II antigen E beta [Source: MarkerSymbol;Acc:MGI:95901] | 8,877                       | 453               | 0.1   |
| <i>Siglech</i>              | Sialic acid-binding Ig-like lectin H [Source: MarkerSymbol;Acc:MGI:2443256]        | 633                         | 17                | 0.0   |
| <i>Mgl1</i>                 | Macrophage galactose N-acetyl-galactosamine specific                               | 154                         |                   |       |
| <i>H2-Ab1</i>               | Histocompatibility 2, class II antigen A, beta 1                                   | 6,391                       | 268               | 0.0   |
| <i>Igl-V1</i>               | Immunoglobulin lambda chain, variable 1                                            | 258                         |                   |       |
| <i>Ly86</i>                 | Lymphocyte antigen 86                                                              | 495                         | 16                | 0.0   |
| <i>H2-Aa</i>                | Histocompatibility 2, class II antigen E alpha                                     | 14,275                      | 391               | 0.0   |
| Cytokines/secreted proteins |                                                                                    |                             |                   |       |
| <i>Cfp</i>                  | Complement factor properdin                                                        | 428                         | 107               | 0.2   |
| <i>Il1b</i>                 | Interleukin-1 beta                                                                 | 467                         | 27                | 0.1   |
| Cytoplasmic proteins        |                                                                                    |                             |                   |       |
| <i>Hck</i>                  | Hemopoietic cell kinase                                                            | 742                         | 174               | 0.2   |
| <i>Txk</i>                  | TXK tyrosine kinase                                                                | 1,112                       | 226               | 0.2   |
| <i>Prkcn</i>                | Protein kinase C, nu                                                               | 169                         | 17                | 0.1   |
| <i>Ncf1</i>                 | Neutrophil cytosolic factor 1                                                      | 366                         | 38                | 0.1   |
| <i>Ctsh</i>                 | Cathepsin H                                                                        | 583                         | 35                | 0.1   |
| <i>Pld4</i>                 | Phospholipase D family, member 4                                                   | 667                         |                   |       |
| <i>Unc93b1</i>              | Unc-93 homolog B1 ( <i>Caenorhabditis elegans</i> )                                | 425                         | 163               | 0.4   |
| <i>Nedd4</i>                | Neural precursor cell expressed                                                    | 395                         | 111               | 0.3   |
| <i>Rnf130</i>               | Ring finger protein 130                                                            | 316                         | 69                | 0.2   |
| <i>Plac8</i>                | Placenta-specific 8                                                                | 1,943                       | 58                | 0.0   |
| <i>Tyrobp</i>               | TYRO protein tyrosine kinase-binding protein                                       | 2,125                       | 65                | 0.0   |
| <i>Pld4</i>                 | Phospholipase D family, member 4                                                   | 667                         |                   |       |
| Cell cycle-related proteins |                                                                                    |                             |                   |       |
| <i>Ccnd1</i>                | Cyclin D1 ( <i>Ccnd1</i> )                                                         | 1,818.8                     | 99.0              | 0.1   |

**Table S2. Primer sequences for quantitative PCR**

| Gene               | Sense                    | Antisense                 |
|--------------------|--------------------------|---------------------------|
| <i>Angptl2</i>     | CTGGACAGGGACCATGATGT     | GGAGTGAGCACAGGCGTTAT      |
| <i>Cbfa2t3 h</i>   | CTGACTGTTCATCAACCAGCAA   | TTACAGCCACTGCACGTCTC      |
| <i>Ccnd1</i>       | GAAACAAGCTCAAGTGGAAACC   | CTTCAATCTGTTCTGGCAG       |
| <i>Ccr8</i>        | AGAAGAAAGGCTCGCTCAGA     | GGCTCCATCGTGAATCCAT       |
| <i>Cebpa</i>       | TGAGAAAAATGAAGGGTGCAG    | CGGGATCTCAGCTTCTGT        |
| <i>c-myc</i>       | CGAAACTCTGGTGATAAACTG    | GAACCGTTCTCCTTAGCTCTCA    |
| <i>Cxcr6</i>       | AAGCTACTGGGCTTCTTCTTG    | CCCATCGTACAGAGCTGACTC     |
| <i>Cyclophilin</i> | GACGAAGGTAGCCAGTCACAAG   | AATCAGGCTGTGGAATGTGAG     |
| <i>Iffng</i>       | ATCTGGAGGAACTGGCAAAA     | TTCAAGACTCAAAGAGTCTGAGG   |
| <i>Il1r2</i>       | CCCATCCCTGTGATCATTTC     | GCACGGGACTATCAGTCTTGA     |
| <i>Il2</i>         | GCTGTTGATGGACCTACAGGA    | TTCAATTCTGTGGCCTGCTT      |
| <i>Il21</i>        | TCATCATTGACCTCGTGGCCC    | ATCGTACTTCTCCACTTGCAATCCC |
| <i>Il4</i>         | GAGAGATCATCGGCATTTTGA    | TCTGTGGTGTCTTCTGTTGC      |
| <i>Irf8</i>        | CCAACCAAGTTCATCCGAGA     | GAATGAGTTTGGAGCGCAAG      |
| <i>Klf2</i>        | CTAAAGGCGCATCTGCGTA      | TAGTGGCGGGTAAGCTCGT       |
| <i>Ly6c</i>        | TCTTGTGGCCCTACTGTGTG     | GCAATGCAGAATCCATCAGA      |
| <i>Pdcd1</i>       | CTACCTCTGTGGGGCCATC      | GAGGTCTCCAGGATTCTCTGT     |
| <i>Pou2af1</i>     | CCTCCTCGGTGTTGACCTAT     | CGGGGTAGCAGTGTCTTCTT      |
| <i>Satb1</i>       | ACTGAAACGAGCCGGAATC      | CGGAGGATTTTCAGAAAGCAA     |
| <i>Slc24a3</i>     | GCCTCATTGTAGCCAGACAAG    | ACGTTGCTCCCAATGGAAT       |
| <i>Sosdc1</i>      | AACAGCACCTGAATCAAGC      | CAGCCCACTTGAACCTCGAC      |
| <i>Spp1</i>        | CCCGGTGAAAGTGACTGATT     | TTCTTCAGAGACACAGCATTCC    |
| <i>Vdr</i>         | CACCTGGCTGATCTTGTGAGT    | CTGGTCATCAGAGGTGAGGTC     |
| <i>Bace2</i>       | CCTGAGAGATGAGAATGCCAGT   | ATCATGGGCTGAATGTAGAGC     |
| <i>Bhlhb2</i>      | TGAAGCAGGTGAAAGCATTG     | TTTCTTCCCCGACAAATCACC     |
| <i>Npas4</i>       | AGGGTTTGTGATGAGTTGC      | CCCTCCACTTCCATCTTC        |
| <i>Grail</i>       | GTAACCCGCACACCAATTTTC    | GTGAGACATGGGGATGACCT      |
| <i>Apoe</i>        | GACCCCTGGAGCTAAGGACT     | AGAGCCTTCATCTTCGCAAT      |
| <i>Tnfsf8</i>      | GAGGATCTCTTGTACCCTGAAA   | TTGGTATTGTTGAGATGCTTTGA   |
| <i>Cd121b</i>      | CCCATCCCTGTGATCATTTC     | GCACGGGACTATCAGTCTTGA     |
| <i>Ecel1</i>       | GCCCAACAAGAATCAAATGG     | CCCCCGTAGTTCAGAGACTG      |
| <i>Bir1</i>        | GGAGGGTACCACTCACATGG     | TTGCCTGCTAACTTCCCTA       |
| <i>Nrbp2</i>       | CTGAGTGACCCCAACATGC      | CGGTGGAAGAGGAGGTTGT       |
| <i>Bcl6</i>        | TTCCGCTACAAGGGCAAC       | CAGCGATAGGGTTTCTCACC      |
| <i>Cd83</i>        | TGGTTCTGAAGGTGACAGGA     | CAACCAGAGAGAAGGCAACAC     |
| <i>Egr2</i>        | GTGCCAGCTGCTATCCAGAAG    | GGCTGTGGTTGAAGCTGGAG      |
| <i>Nfil3</i>       | AGGCCGATGAGGGTGTAGT      | GCCCTTAGGGACCTGTTGTT      |
| <i>Batf</i>        | AGCTTCAGCCGCTCTCT        | GCAGCGATGCGATTCTTC        |
| <i>Scin</i>        | CACAGTTCTCCGAGATGG       | CACTGTTCTCTACACGCCAGA     |
| <i>Rgs16</i>       | GGCCAGTAAGCATAACAAGAGA   | TCAGCAGCAAATCGAAAGAC      |
| <i>Cd200</i>       | CTCCACCTACAGCCTGATTTG    | CCTGGGTCAACCACTTCCA       |
| <i>Hif1a</i>       | GCACTAGACAAAGTTCACCTGAGA | CGCTATCCACATCAAAGCAA      |
| <i>Nr4a2</i>       | TCAGAGCCACGTCGATT        | TAGTCAGGGTTGCTGGAA        |
| <i>Tnfrsf9</i>     | TGTGACTCCAGAGGGAGGAC     | AGCAGCAAAGCCGATGTC        |
| <i>Cd81</i>        | CCTGGAACCTGGGAAACAAAC    | GCTCCACAGCAATGAGAAT       |
| <i>Ly6d</i>        | TCTGCTCGTCTCTTGTCT       | GTGCACACGTGACATCGAA       |
| <i>Trat</i>        | AGGAAGTGGCTGCACCTG       | CCAGTGAGGCATAGCACATC      |
| <i>Ly86</i>        | ATTCTGAACTACTCTATCCCCTT  | GGCCGGCATAGTATATCTGTTCT   |
